# Supplementary material
Source: Research Square preprint supplement (doi:10.21203/rs.3.rs-9336889/v1)
Supplement: Supplementary file 1 [file 88715d8fe5ae72d35633ddf9.docx]

**Supplementary Information**

*Leading organ-failure phenotype and subsequent new-onset atrial fibrillation in prolonged ICU stays: derivation in MIMIC-IV and external validation in eICU-CRD*

**Supplementary Methods**

Primary phenotype selection. We selected the five-system phenotype as the primary exposure because the neurological SOFA component was not robustly transportable across databases and showed domination by sedation- and intubation-related Glasgow Coma Scale suppression in preliminary derivation analyses. The six-system phenotype was therefore retained only as a sensitivity construct.

Transportable validation model. The reduced transportable model excluded Charlson index and sepsis flag because these variables were not structurally transportable in the eICU extraction, and excluded magnesium and heparin exposure because validation-cohort missingness or coding structure would have reduced transportability. The derivation full model remained the primary etiologic model.

Missing data. We used complete-case analysis for model fitting because missingness was low in derivation and modest in validation. We did not perform formal tests of the missing-data mechanism.

**Supplementary Table 1. Missingness of modeled variables in derivation and validation cohorts.**

| **Variable** | **MIMIC missing %** | **eICU missing %** |
| --- | --- | --- |
| new_onset_af_after72h | 0.000 | nan |
| leading_organ_5sys_cat | 0.000 | 0.000 |
| male | 0.000 | 0.000 |
| age | 0.000 | 0.000 |
| charlson | 0.000 | nan |
| sepsis_flag | 0.000 | nan |
| day1_sofa_total | 0.000 | 0.000 |
| day3_sofa_total | 0.000 | 0.000 |
| potassium_min_48h | 0.500 | 1.930 |
| magnesium_min_48h | 0.660 | nan |
| platelet_min_72h | 0.470 | 2.840 |
| creatinine_max_72h | 0.460 | 1.360 |
| anticoag_exposure_72h | 0.000 | 0.000 |
| heparin_exposure_72h | 0.000 | nan |
| vasopressor_any_72h | 0.000 | 0.000 |
| mv_any_72h | 0.000 | 0.000 |
| crrt_any_72h | 0.000 | 0.000 |
| pragmatic_af_after72h | nan | 0.000 |

**Supplementary Table 2. Six-system phenotype sensitivity analysis in MIMIC-IV.**

| **leading_organ_6sys_cat** | **N** | **Events** | **Rate** | **Rate %** |
| --- | --- | --- | --- | --- |
| No failure | 27 | 1 | 0.037 | 3.7 |
| Cardiovascular | 2432 | 147 | 0.060 | 6.0 |
| Respiratory | 1011 | 43 | 0.043 | 4.3 |
| Renal | 255 | 9 | 0.035 | 3.5 |
| Hepatic | 3 | 0 | 0.000 | 0.0 |
| Coagulation | 1 | 0 | 0.000 | 0.0 |
| Neurological | 8006 | 167 | 0.021 | 2.1 |

**Supplementary Table 3. Secondary outcome rates by phenotype in derivation and validation cohorts.**

| **Phenotype** | **MIMIC AF after 72h %** | **MIMIC AF before discharge %** | **MIMIC 28-day death %** | **MIMIC hospital death %** | **eICU AF after 72h %** | **eICU AF before discharge %** | **eICU 28-day death %** | **eICU hospital death %** |
| --- | --- | --- | --- | --- | --- | --- | --- | --- |
| No failure | 1.4 | 2.9 | 10.7 | 7.4 | 4.2 | 8.1 | 3.6 | 7.6 |
| Cardiovascular | 5.5 | 9.0 | 26.0 | 23.3 | 7.5 | 10.2 | 12.0 | 19.4 |
| Respiratory | 3.3 | 4.7 | 20.1 | 16.9 | 5.7 | 7.3 | 12.2 | 18.0 |
| Renal | 2.9 | 4.4 | 27.1 | 21.5 | 5.3 | 8.2 | 7.4 | 14.0 |
| Hepatic | 3.2 | 5.4 | 43.4 | 40.3 | 2.7 | 4.9 | 16.0 | 31.7 |
| Coagulation | 3.4 | 6.0 | 35.3 | 32.3 | 6.1 | 9.4 | 12.8 | 25.1 |
